# Supplementary material for: ST‐Segment–Elevation Myocardial Infarction (STEMI) Patients Without Standard Modifiable Cardiovascular Risk Factors—How Common Are They, and What Are Their Outcomes?
Source: PubMed Central journal article supplement — J Am Heart Assoc. 2019 Nov 1;8(21):e013296. doi: 10.1161/JAHA.119.013296 (PMC6898813; doi:10.1161/jaha.119.013296), 2019-11-01
Supplement: JAH3-8-e013296-s001.pdf [file JAH3-8-e013296-s001.pdf]

# **SUPPLEMENTAL MATERIAL**

**Table S1. Baseline, presentation and in-hospital management characteristics of subjects with 6 month follow up data versus those without 6 month follow up data.**

| Variable                                     | Statistic/Level | 6 month follow up data collected<br>N=2487 | Lost to follow up<br>N=594 | Overall<br>N=3081 |
|----------------------------------------------|-----------------|--------------------------------------------|----------------------------|-------------------|
| Age                                          | Mean (SD)       | 60.3 (12.6)                                | 62.3 (12.5)                | 60.6 (12.8)       |
|                                              | Minimum         | 23.0                                       | 23.0                       | 23.0              |
|                                              | Median (IQR)    | 60 (51-79)                                 | 62 (52-71)                 | 60 (52-69)        |
| Sex                                          | Female (%)      | 606 (24)                                   | 165 (28)                   | 771 (25)          |
|                                              | Male (%)        | 1881 (76)                                  | 429 (72)                   | 2310 (75)         |
| SMuRFs*                                      |                 |                                            |                            |                   |
| Diabetes (%)                                 |                 | 442 (18)                                   | 112 (19)                   | 554 (18)          |
| Hypertension (%)                             |                 | 1096 (44)                                  | 267 (45)                   | 1363 (44)         |
| Dyslipidaemia (%)                            |                 | 933 (38)                                   | 193 (32)                   | 1126 (37)         |
| Current smoker (%)                           |                 | 1008 (41)                                  | 235 (40)                   | 1243 (40)         |
| Family history of coronary heart disease (%) |                 | 805 (37)                                   | 165 (29)                   | 970 (35)          |
| BMI†                                         | Mean (SD)       | 28.3 (5.3)                                 | 28.1 (5.3)                 | 28.2 (5.3)        |
|                                              | Median (IQR)    | 27.4 (24.8-30.9)                           | 27.5 (24.5-30.9)           | 27.4 (24.7-30.9)  |
| Previous atrial fibrillation (%)             |                 | 67 (3)                                     | 25 (4)                     | 92 (3)            |

| Variable                        | Statistic/Level | 6 month follow up data collected N=2487 | Lost to follow up N=594 | Overall N=3081 |
|---------------------------------|-----------------|-----------------------------------------|-------------------------|----------------|
| History of bleeding (%)         |                 | 24 (1)                                  | 3 (1)                   | 27 (1)         |
| Pre-hospital medications        |                 |                                         |                         |                |
| Statin (%)                      |                 | 398 (16)                                | 91 (15)                 | 489 (16)       |
| Aspirin (%)                     |                 | 309 (12)                                | 63 (11)                 | 372 (12)       |
| P2Y12 Inhibitor (%)             |                 | 40 (2)                                  | 12 (2)                  | 52 (2)         |
| Betablocker (%)                 |                 | 175 (7)                                 | 44 (7)                  | 219 (7)        |
| ACE inhibitor (%)§              |                 | 284 (11)                                | 60 (10)                 | 344 (11)       |
| ARB (%)                         |                 | 337 (14)                                | 92 (16)                 | 429 (14)       |
| Systolic blood pressure (mmHg)  | Mean (SD)       | 138.1 (21.2)                            | 135.3 (29.7)            | 137.6 (27.7)   |
|                                 | Median (IQR)    | 136 (120-155)                           | 135 (115-155)           | 136 (119-155)  |
| Diastolic blood pressure (mmHg) | Mean (SD)       | 82.5 (17.2)                             | 81.0 (18.3)             | 82.2 (17.4)    |
|                                 | Median (IQR)    | 80 (70-92)                              | 80 (70-93)              | 80 (70-93)     |
| Heart rate (per min)            | Mean (SD)       | 78.0 (19.3)                             | 80.9 (22.0)             | 78.6 (19.9)    |
|                                 | Median (IQR)    | 76 (64-90)                              | 78 (65-94)              | 76 (65-90)     |
| Killip class                    | 1               | 2268 (92)                               | 508 (86)                | 2776 (91)      |
|                                 | 2               | 159 (6)                                 | 46 (8)                  | 205 (7)        |
|                                 | 3               | 34 (1)                                  | 20 (3)                  | 54 (2)         |
|                                 | 4               | 12 (0)                                  | 15 (3)                  | 27 (1)         |

| Variable                                | Statistic/Level | 6 month follow up data collected N=2487 | Lost to follow up N=594 | Overall N=3081 |
|-----------------------------------------|-----------------|-----------------------------------------|-------------------------|----------------|
| Cardiac arrest on admission             |                 | 154 (6)                                 | 74 (13)                 | 228 (7)        |
| Abnormal cardiac biomarker              |                 | 2052 (98)                               | 494 (98)                | 2546 (98)      |
| Serum creatinine                        | Mean (SD)       | 89.1 (29.0)                             | 97.5 (63.3)             | 90.7 (38.2)    |
|                                         | Median (IQR)    | 84 (72-100)                             | 88 (73-104)             | 85 (72-100)    |
| Grace Risk Score (Fox)                  | Mean (SD)       | 107.5 (28.1)                            | 116.5 (34.4)            | 109.2 (29.6)   |
|                                         | Median (IQR)    | 106 (88-125)                            | 111 (91-136)            | 107 (89-127)   |
| Left Ventricular function grade         |                 |                                         |                         |                |
| Normal (%)                              |                 | 508 (36)                                | 118 (36)                | 626 (36)       |
| Mild impairment (%)                     |                 | 512 (36)                                | 97 (29)                 | 609 (35)       |
| Moderate impairment (%)                 |                 | 329 (23)                                | 89 (27)                 | 418 (24)       |
| Severe impairment (%)                   |                 | 73 (5)                                  | 28 (8)                  | 101 (6)        |
| Culprit Lesion Territory                |                 |                                         |                         |                |
| Left main (%)                           |                 | 4 (1)                                   | 1 (2)                   | 5 (1)          |
| Left Anterior Descending (%)            |                 | 153 (38)                                | 25 (39)                 | 178 (38)       |
| Circumflex Artery (%)                   |                 | 48 (12)                                 | 7 (11)                  | 55 (12)        |
| Right Coronary (%)                      |                 | 148 (37)                                | 25 (39)                 | 173 (37)       |
| Unknown (%)                             |                 | 46 (12)                                 | 6 (9)                   | 52 (11)        |
| Multi-vessel disease > 50% stenosis (%) |                 | 1013 (41)                               | 228 (42)                | 1241 (41)      |

| Variable                            | Statistic/Level | 6 month follow up data collected N=2487 | Lost to follow up N=594 | Overall N=3081 |
|-------------------------------------|-----------------|-----------------------------------------|-------------------------|----------------|
| In-hospital treatment               |                 |                                         |                         |                |
| Statin (%)                          |                 | 2318 (93)                               | 484 (82)                | 2802 (91)      |
| Aspirin (%)                         |                 | 2452 (99)                               | 556 (94)                | 3008 (98)      |
| P2Y12 Inhibitor (%)                 |                 | 2071 (83)                               | 508 (86)                | 2579 (84)      |
| ACE Inhibitor (%)§                  |                 | 1819 (73)                               | 355 (60)                | 2174 (71)      |
| ARB (%)                             |                 | 251 (10)                                | 71 (12)                 | 322 (10)       |
| Heparin (%)                         |                 | 1938 (78)                               | 462 (78)                | 2400 (78)      |
| Low molecular weight heparin (%)    |                 | 830 (33)                                | 166 (28)                | 996 (32)       |
| Thrombolysis (%)                    |                 | 921 (37)                                | 186 (31)                | 1107 (36)      |
| Primary PCI in STEMI patients (%)‡§ |                 | 1113 (45)                               | 277 (47)                | 1390 (45)      |
| Hospital transfer (%)               |                 | 1055 (42)                               | 250 (42)                | 1305 (42)      |
| PCI (%)‡                            |                 | 1724 (69)                               | 399 (67)                | 2123 (69)      |
| CABG (%)Ī                           |                 | 143 (6)                                 | 32 (5)                  | 175 (6)        |
| Discharge medications               |                 |                                         |                         |                |
| Statin (%)                          |                 | 2192 (93)                               | 455 (84)                | 2647 (92)      |
| Aspirin (%)                         |                 | 2144 (92)                               | 464 (86)                | 2608 (90)      |
| P2Y12 Inhibitor (%)                 |                 | 1832 (78)                               | 418 (77)                | 2250 (78)      |
| Betablocker (%)                     |                 | 2003 (85)                               | 403 (74)                | 2406 (83)      |

| <b>Variable</b>    | <b>Statistic/Level</b> | <b>6 month follow up data collected<br/>N=2487</b> | <b>Lost to follow up<br/>N=594</b> | <b>Overall<br/>N=3081</b> |
|--------------------|------------------------|----------------------------------------------------|------------------------------------|---------------------------|
| ACE inhibitor (%)§ |                        | 1675 (71)                                          | 303 (56)                           | 1978 (69)                 |
| ARB (%)            |                        | 205 (9)                                            | 60 (11)                            | 265 (9)                   |

\*Standard modifiable cardiovascular risk factors (SMuRFs)

†Body mass index (BMI)

‡Coronary heart disease(CHD)

§Angiotensin converting enzyme (ACE)

|| Angiotensin II Receptor Antagonist Blocker (ARB)

‡Percutaneous coronary intervention (PCI)

§ST elevation myocardial infarction (STEMI)

‡ Coronary artery bypass graft surgery (CABG)
